# Supplementary material for: Targeted epigenomic editing ameliorates adult anxiety and excessive drinking after adolescent alcohol exposure
Source: PubMed Central journal article supplement — Sci Adv. 2022 May 4;8(18):eabn2748. doi: 10.1126/sciadv.abn2748 (PMC9067919; doi:10.1126/sciadv.abn2748), 2022-05-04
Supplement: sciadv.abn2748_sm.pdf [file sciadv.abn2748_sm.pdf]

Supplementary Materials for  
**Targeted epigenomic editing ameliorates adult anxiety and excessive drinking  
after adolescent alcohol exposure**

John Peyton Bohnsack, Huaibo Zhang, Gabriela M. Wandling, Donghong He, Evan J. Kyzar,  
Amy W. Lasek, Subhash C. Pandey\*

\*Corresponding author. Email: [spandey@uic.edu](mailto:spandey@uic.edu)

Published 4 May 2022, *Sci. Adv.* **8**, eabn2748 (2022)  
DOI: [10.1126/sciadv.abn2748](https://doi.org/10.1126/sciadv.abn2748)

**This PDF file includes:**

Figs. S1 to S6  
Tables S1 to S6

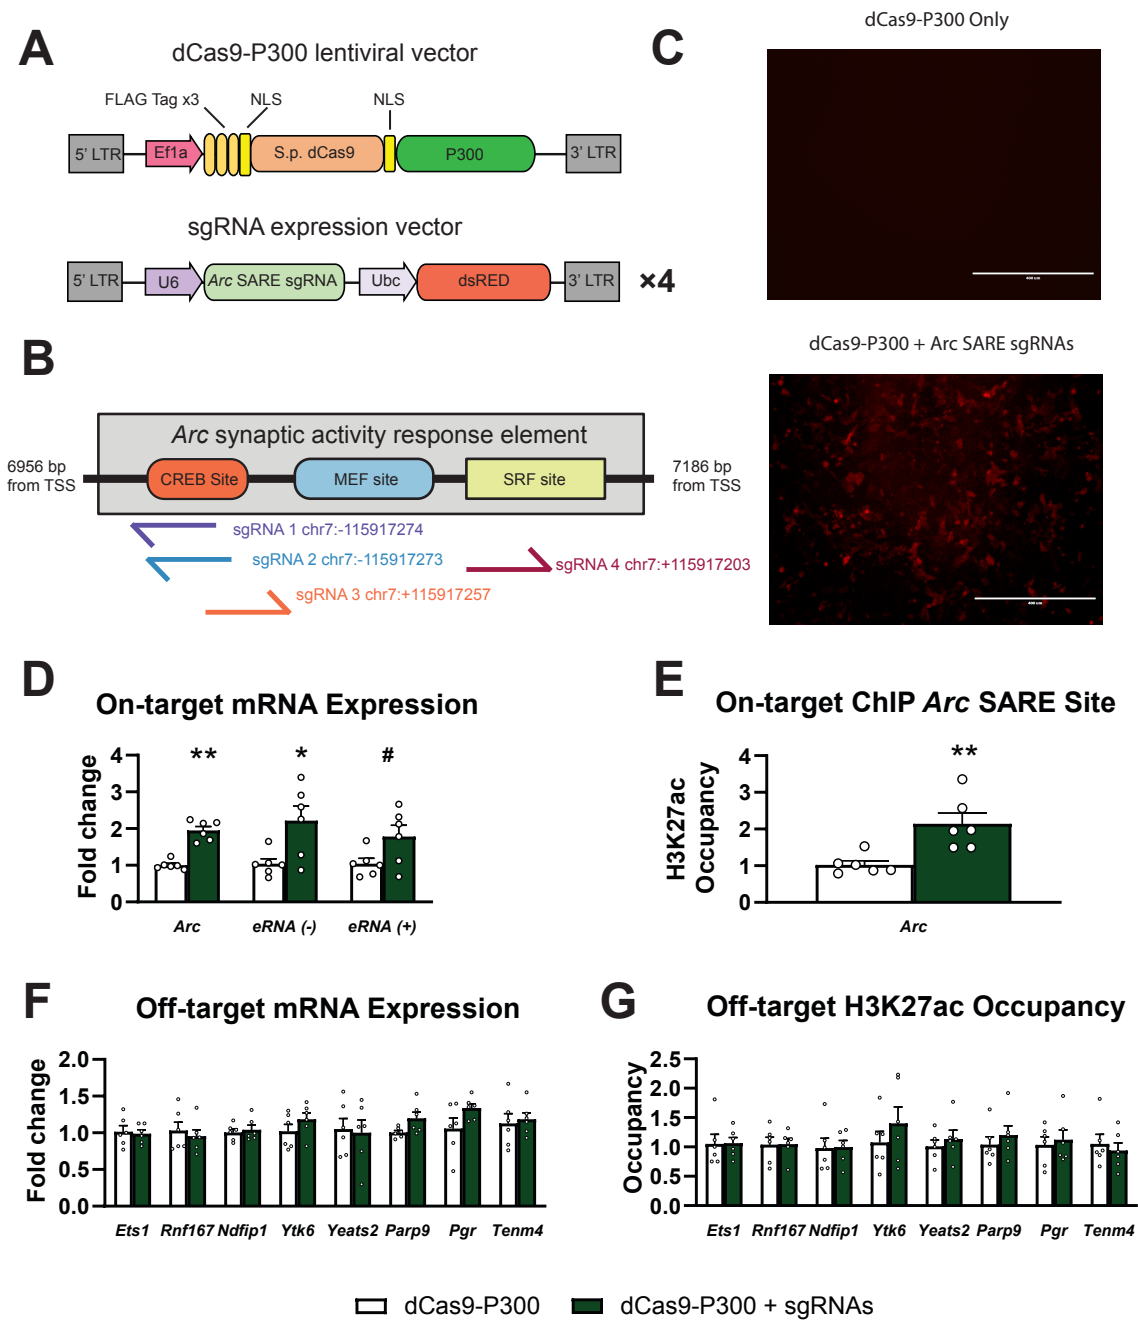

**Fig. S1. Design of dCas9-P300 vector and sgRNAs for the Arc SARE site as well as *in vitro* experiments in PC12 cells.** A) Diagram of dCas9-P300 vector and sgRNAs for Arc SARE. B) Diagram of the SARE site of the Arc gene and locations of four guided RNAs (sgRNAs) that were developed and used in the study. C) PC12 cells were treated with either dCas9-P300 only or dCas9-P300 plus SARE sgRNAs tagged with mCherry (Ds-Red protein) and these images (scale bar, 400  $\mu$ m) show transductions in cells treated with dCas9-P300 + SARE sgRNAs. D) Bar diagram showing that epigenomic editing at SARE site with dCas9-P300 in PC12 cells significantly increased Arc mRNA

(Mann-Whitney test,  $U=36$ ,  $p=0.002$ ) and (-) eRNA ( $t_{10}=2.808$ ,  $p=0.019$ ) levels as well as (E) increases ( $t_{10}=3.580$ ,  $p=0.005$ ) in occupancy of H3K27ac at *Arc* SARE site after transduction with dCas9-P300 + sgRNAs. F) dCas9-P300 + sgRNAs transduction did not change mRNA levels of off-target genes. G) Transduction of dCas9-P300 + sgRNAs did not increase occupancy of H3K27ac at predicted off-target genomic locations. Bar graphs show mean  $\pm$  SEM ( $n=6$ ) and individual values are shown with circle dots on bar graphs. \* $p<0.05$ , \*\* $p<0.01$  are significantly different from control groups (dCas9-P300 only). # (+) eRNA ( $t_{10}=2.184$ ,  $p=0.054$ ).

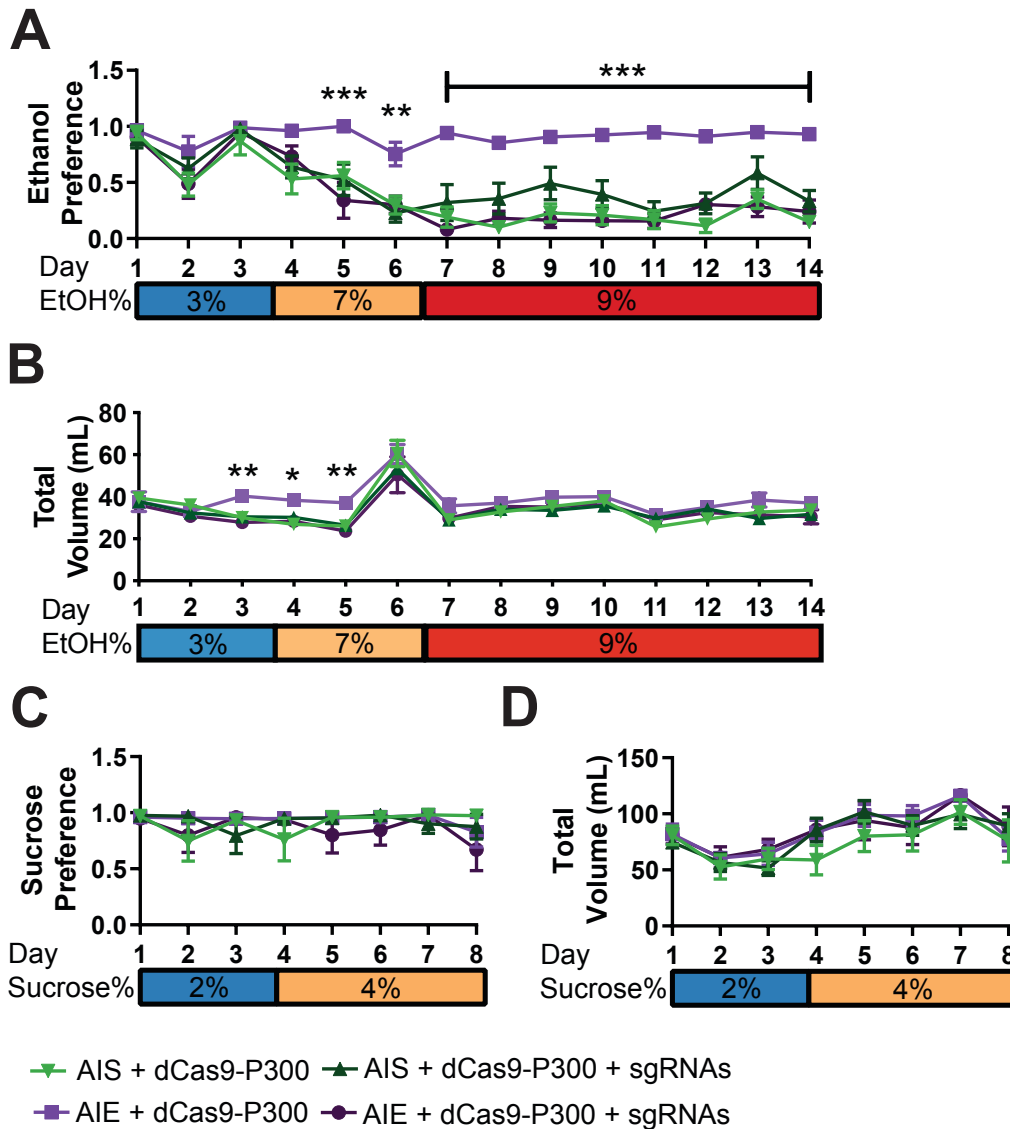

**Fig. S2. Effects of the infusion of dCas9-P300 or dCas9-P300 plus *Arc* SARE sgRNAs into central nucleus of amygdala (CeA) on alcohol and sucrose drinking measures in AIS and AIE adult rats. A) AIE exposure significantly increased alcohol**

preference which is attenuated by the infusion of dCas9-P300 plus sgRNAs of *Arc SARE* into CeA (lentivirus x day interaction,  $F_{39,247}=2.932$ ,  $p<0.001$ ). Other groups show no changes in alcohol preference. B) dCas9-P300 + sgRNAs infusion into CeA have no effects on total fluid intake (mL/day) either in AIS or AIE adult rats at the higher doses of ethanol intake. C) dCas9-P300 + sgRNAs infusion into CeA have no effects on sucrose preference or total fluid intake (D) in AIS and AIE adult rats. Each value represents mean  $\pm$  SEM (n=5-6 rats) for each day either for alcohol or sucrose intake. \* $p<0.05$ , \*\* $p<0.01$ , and \*\*\* $p<0.001$  are significantly different from respective control groups (AIE rats infused with dCas9-P300 vs AIE rats infused with dCas9-P300+ sgRNAs).

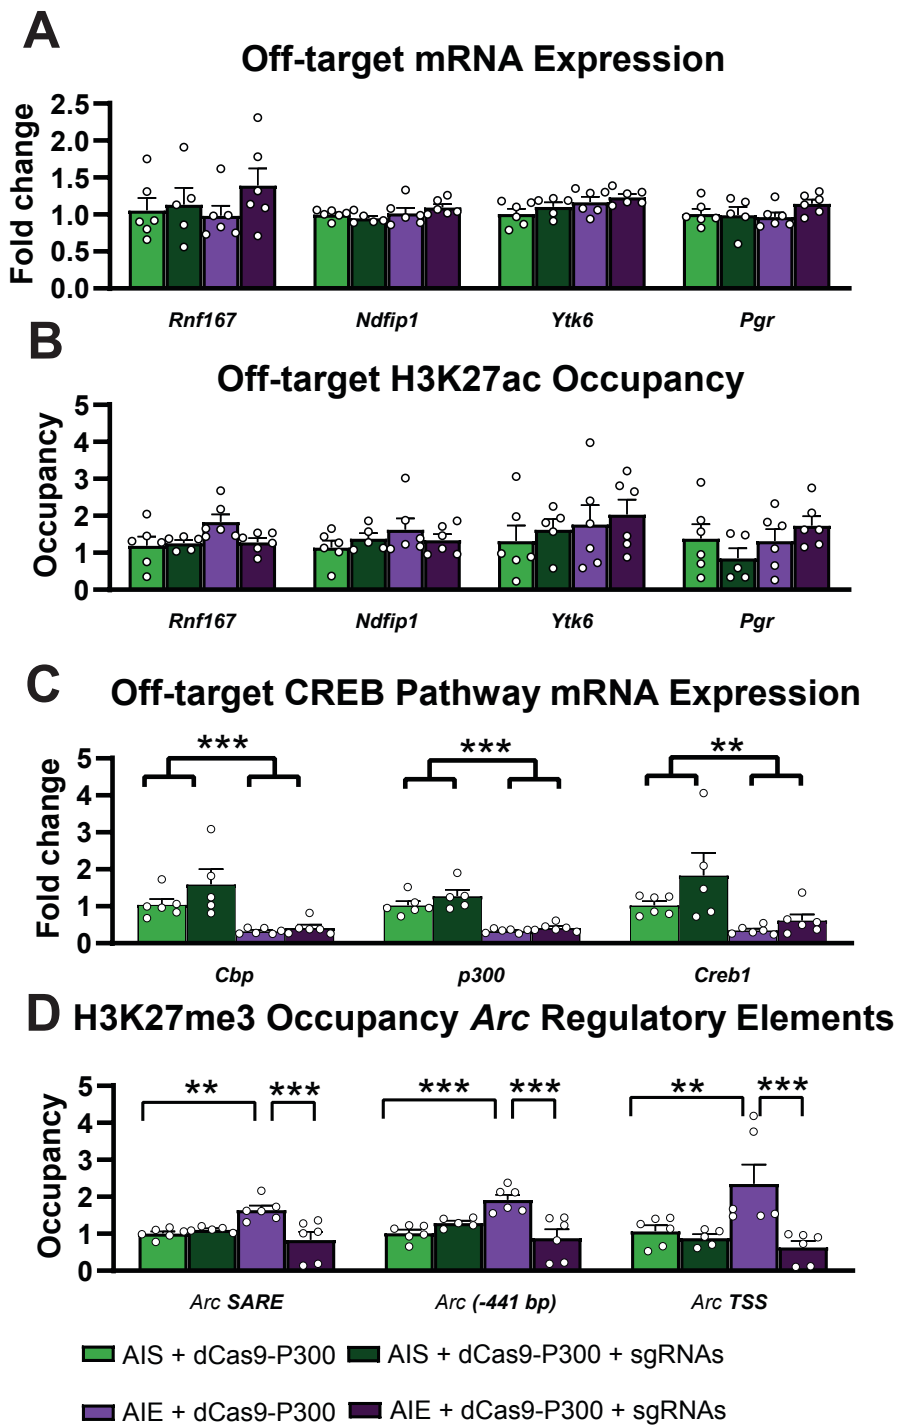

**Fig. S3 Effects of in vivo CeA-infusion of dCas9-P300 or dCas9-P300 plus sgRNAs on off-target gene expression and histone acetylation (H3K27ac) as well as histone methylation (H3K27me3) of *Arc* regulatory sites in the amygdala of AIS and AIE adult rats. Infusion of dCas9-P300 plus sgRNAs of *Arc* SARE into CeA has no**

effects on the expression (A) and occupancy of H3K27ac (B) of off-target genes in the amygdala of AIS and AIE adult rats. C) Bar diagram showing that AIE significantly decreased the expression of various genes of the CREB pathway (*Cbp*, adolescent exposure,  $F_{1,19} = 23.196$ ,  $p < 0.001$ ; *p300*, adolescent exposure  $F_{1,19} = 64.551$ ,  $p < 0.001$  and *Creb1*, adolescent exposure,  $F_{1,19} = 11.426$ ,  $p = 0.003$ ) in adult amygdala, which are not modulated by the infusion of dCas9-P300 + sgRNAs into the CeA of AIE adult rats. D) AIE significantly increased the occupancy of H3K27me3 at *Arc* regulatory sites (*Arc* SARE, adolescent exposure x lentivirus infusion,  $F_{1,19} = 11.327$ ,  $p = 0.003$ , *Arc* -441bp, adolescent exposure x lentivirus infusion,  $F_{1,19} = 18.30$ ,  $p < 0.001$ , and *Arc* TSS, adolescent exposure x lentivirus infusion,  $F_{1,19} = 6.541$ ,  $p = 0.019$ ), which was normalized by the infusion of dCas9-P300 + sgRNAs into CeA of AIE adult rats. Bar graphs show mean  $\pm$  SEM (n=5-6) and individual values are shown with circle dots on bar graphs. Two-way ANOVA followed by Tukey test, \*\* $p < 0.01$ , \*\*\* $p < 0.001$  are significantly different from respective control groups (AIS+dCas9-P300 vs AIE rats infused with dCas9-P300 and AIE+ dCas9-P300 vs AIE rats infused with dCas9-P300 plus sgRNAs).

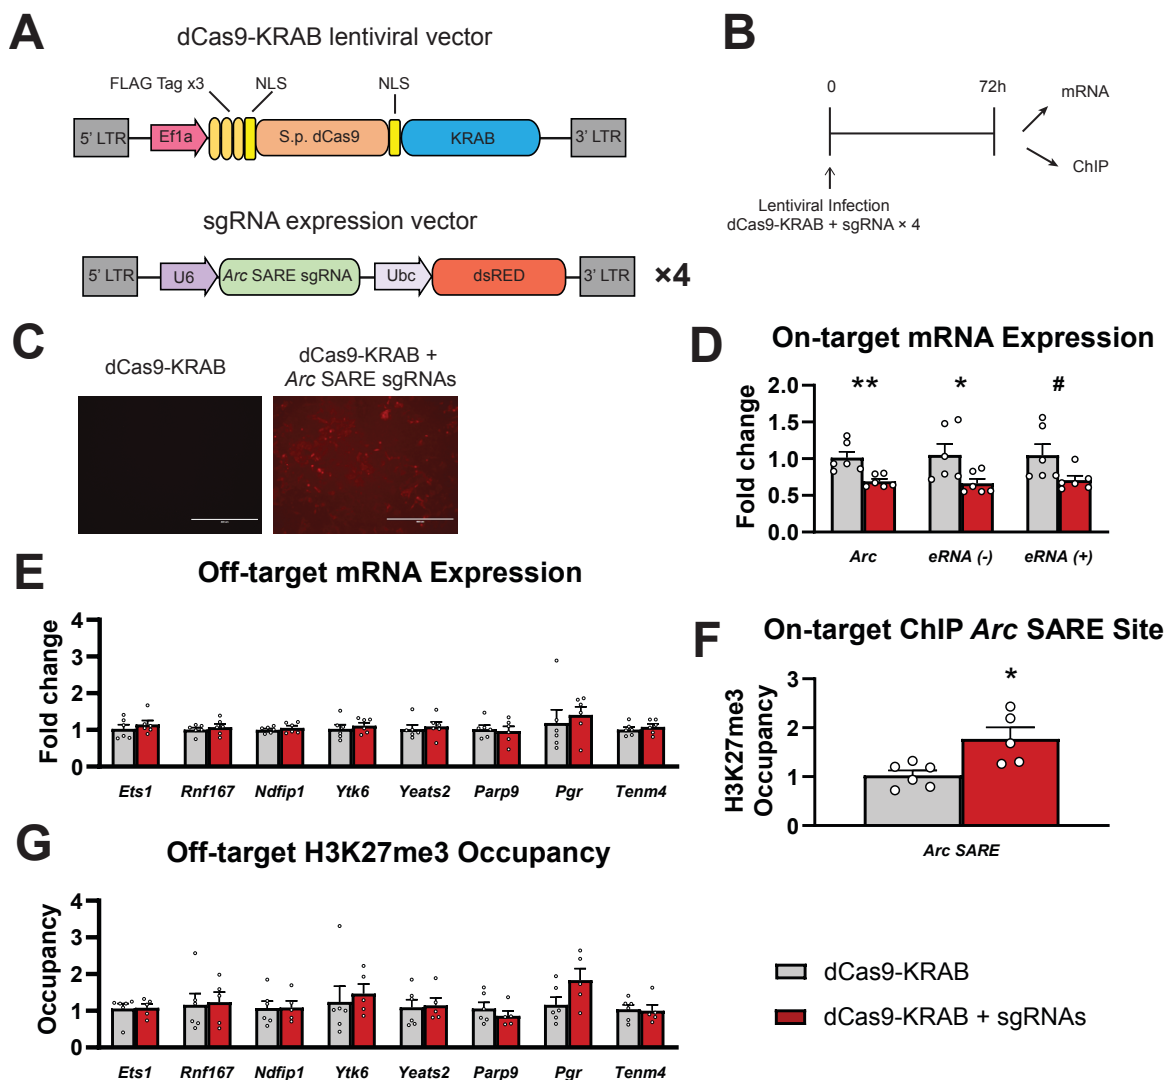

**Fig.S4. Design of dCas9-KRAB vector and sgRNAs for the Arc SARE site as well as validation experiments in PC12 cells.** A) This diagram represents the design of lentiviral vectors of dCas9-KRAB and sgRNAs for Arc SARE. B) PC-12 cells were treated with either dCas9-KRAB or dCas9-KRAB plus SARE sgRNAs (four sgRNAs together) tagged with mCherry (Ds-Red protein) and these images (scale bar, 400  $\mu$ m) show transductions in cells (C) treated with dCas9-KRAB plus SARE sgRNAs. D) Bar diagram showing decreased Arc mRNA expression ( $t_{10}=3.684$ ,  $p=0.004$ ), (-) Arc eRNA ( $t_{10}=2.386$ ,  $p=0.038$ ), and (+) Arc eRNA ( $t_{10}=2.125$ , # $p=0.059$ ) levels after dCas9-KRAB plus sgRNAs treatment. E) dCas9-KRAB plus sgRNAs treatment did not change expression of predicted off-target genes, but increased H3K27me3 occupancy (Mann-Whitney test,  $U=2.0$ ,  $p=0.017$ ) at Arc SARE site (F). G) Treatment with dCas9-KRAB plus sgRNAs did not change H3K27me3 occupancy at predicted off-target genome sites. Values are mean  $\pm$  SEM ( $n=5-6$ ) and individual values are shown with circle dots

on bar graphs. \* $p < 0.05$ , \*\* $p < 0.01$  are significantly different from control groups (dCas9-KRAB only).

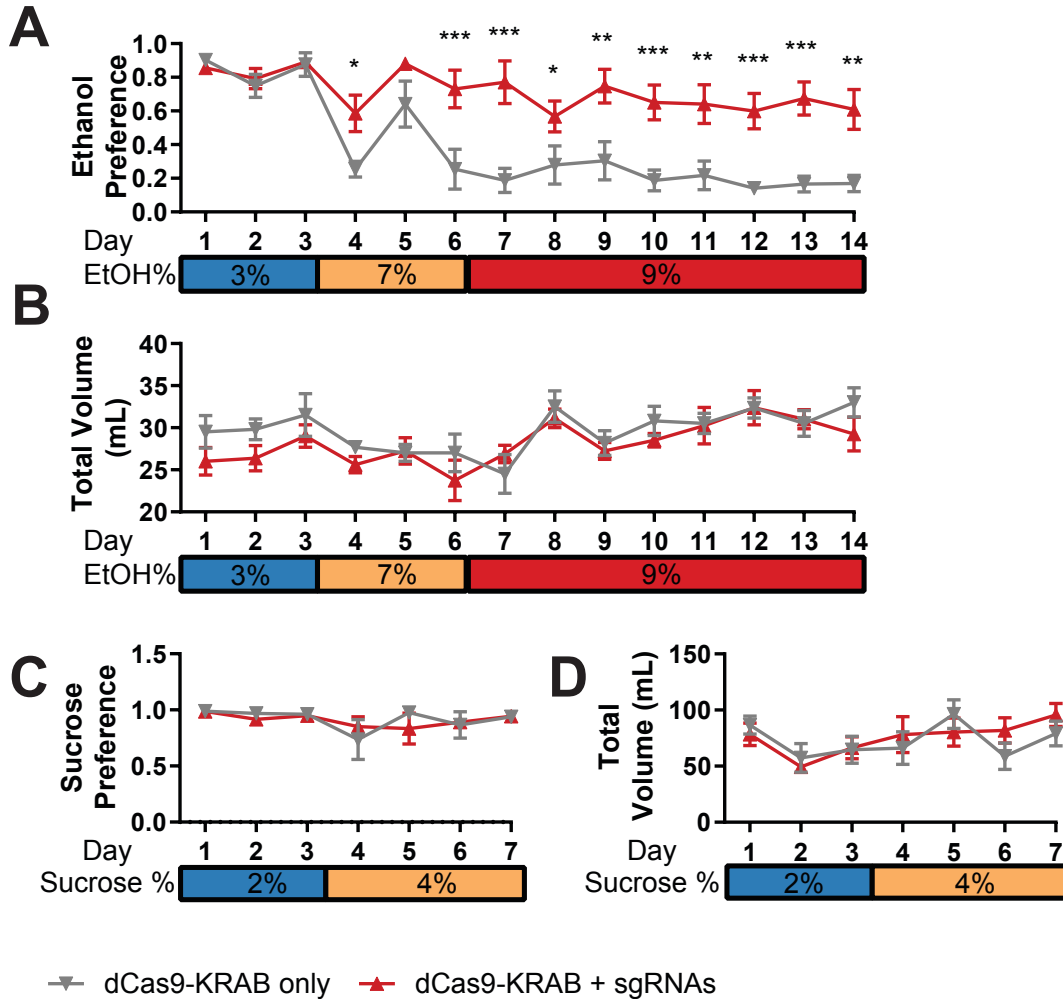

**Fig. S5. Effects of in vivo CeA-infusion of dCas9-KRAB or dCas9-KRAB plus Arc SARE sgRNAs on alcohol and sucrose drinking measures in alcohol naïve control adult rats.** A) Alcohol preference is significantly (lentivirus infusion x day interaction,  $F_{13,156} = 3.672$ ,  $p < 0.001$ ) increased by the infusion of dCas9-KRAB plus sgRNAs of Arc SARE into CeA of control adult rats. B) dCas9-KRAB + sgRNAs infusion into CeA have no effects on total fluid intake (mL/day) in control rats. C) dCas9-KRAB + sgRNAs infusion into CeA have no effects on sucrose preference or total fluid intake (D) in control rats. Each value represents mean  $\pm$  SEM for each day either for alcohol ( $n = 6-8$  rats) or sucrose ( $n = 5-7$  rats) intake. Two-way repeated measures ANOVA followed by Tukey test: \* $p < 0.05$ , \*\* $p < 0.01$ , and \*\*\* $p < 0.001$  are significantly different from control groups (rats infused with dCas9-KRAB only into CeA).



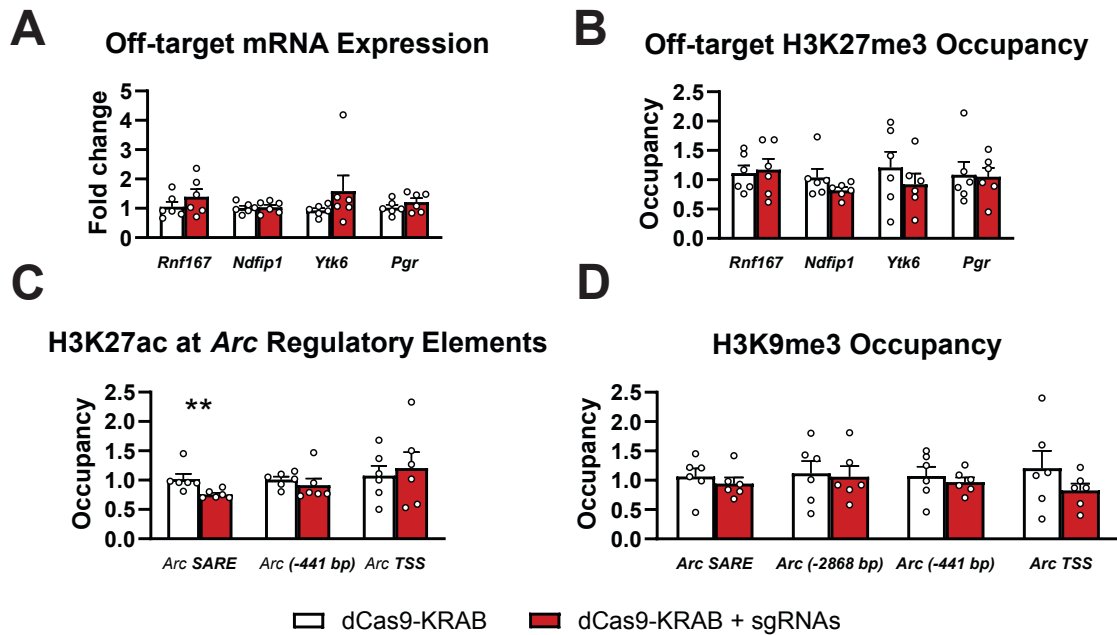

**Fig. S6. Effects of in vivo CeA-infusion of dCas9-KRAB or dCas9-KRAB plus *Arc* SARE sgRNAs on off-target genes expression and histone trimethylation (H3K27me3) as well as histone acetylation (H3K27ac) and H3K9me3 of *Arc* regulatory sites in the amygdala of alcohol naïve control adult rats.** A) Infusion of dCas9-KRAB plus sgRNAs into CeA has no effects on the expression and occupancy of H3K27me3 (B) of additional off-target genes in the amygdala of control rats. C) Bar diagram showing that dCas9-KRAB + sgRNAs infusion into CeA decreased the occupancy of H3K27ac at *Arc* SARE (Mann-Whitney rank sum test,  $U=1.0$ ,  $p=0.004$ ) but not at other sites of *Arc* gene in the amygdala. D) Bar diagram showing that dCas9-KRAB + sgRNAs infusion into CeA produced no change in occupancy of H3K9me3 at *Arc* SARE and other sites of *Arc* gene in the amygdala. Values are mean  $\pm$  SEM ( $n=6$  in each group) and individual values are shown with circle dots on bar graphs. \*\* $p<0.01$  are significantly different from control groups (rats infused with dCas9-KRAB only into CeA).

**Table S1:** Various primers sequences used in qPCR, ChIP assay, and 3C-qPCR assay. Sequences for the single guide (sg) RNAs of *Arc* SARE site are also shown in the table.

| Primer Name                                              | Sequence (5' to 3')               |
|----------------------------------------------------------|-----------------------------------|
| <b>RNA Primers</b>                                       |                                   |
| <i>Arc</i> forward                                       | ACA GAG GAT GAG ACT GAG GCA C     |
| <i>Arc</i> reverse                                       | TAT TCA GGC TGG GTC CTG TCA C     |
| <i>Creb1</i> forward                                     | AGA AGC AGC ACG AAA GAG AG        |
| <i>Creb1</i> reverse                                     | CAC TGC CAC TCT GTT CTC TAA A     |
| <i>Cbp</i> forward                                       | TAA TGG AGG CTG CCC AGT GTG TAA   |
| <i>Cbp</i> reverse                                       | CTG GCG GAG CTT GTG TTT GAT GTT   |
| <i>p300</i> forward                                      | AAA CAC CAG CAA CGA GAG TAC CGA   |
| <i>p300</i> reverse                                      | TCC ATG GTG GCG TAC AGT TTC TGA   |
| <i>Hprt1</i> forward                                     | TCC TCA GAC CGC TTT TCC CGC       |
| <i>Hprt1</i> reverse                                     | TCA TCA TCA CTA ATC ACG ACG CTG G |
| <i>Ets1</i> forward                                      | CTC TCT GCT CCG CCA AGT G         |
| <i>Ets1</i> reverse                                      | ACA GAG CGC AGC CCT AAA AT        |
| <i>Rnf167</i> forward                                    | GCA CGC TCT ACG TGT CGA A         |
| <i>Rnf167</i> reverse                                    | CAC CCC TAG GTC CCA CTT CT        |
| <i>Ndfip1</i> forward                                    | CAC CAC CAG GAT GGA GGA AC        |
| <i>Ndfip1</i> reverse                                    | CCC TTT TCA AAC AGC CAG CC        |
| <i>Ytk6</i> forward                                      | TTC TCA AAG CCG CGT ACG AT        |
| <i>Ytk6</i> reverse                                      | TTG GTC TCA TCC AGT TCG GC        |
| <i>Yeats2</i> forward                                    | TTG GTC CAT GTA GCA GGT CG        |
| <i>Yeats2</i> reverse                                    | CGT CCC AAT GAG CCC CTC TA        |
| <i>Parp9</i> forward                                     | TTC TGT CTT CCG AGA CGC TG        |
| <i>Parp9</i> reverse                                     | CAT CGG CTG GTC TTT CGG T         |
| <i>Pgr</i> forward                                       | GGC TGT CAC TAT GGT GTG CT        |
| <i>Pgr</i> reverse                                       | GTG TCG GGC TTT GTG TTG TC        |
| <i>Tenm4</i> forward                                     | GCC GCA CAG GCA CTA ATT TC        |
| <i>Tenm4</i> reverse                                     | GCT GGG ATG ATC GGT TTC G         |
| <i>Arc</i> eRNA (+) forward                              | CCG GAG ACT GGT GAC ATT GC        |
| <i>Arc</i> eRNA (+) reverse                              | CCC AGA ACT CGA GGG TAC AA        |
| <i>Arc</i> eRNA (-) forward                              | TCT CCA TAG CAG GGG CAG TT        |
| <i>Arc</i> eRNA (-) reverse                              | AGG ACC AGG ATA CAG GGA GAC       |
| <b>Chromatin Immunoprecipitation (ChIP)- PCR Primers</b> |                                   |
| <i>Arc</i> SARE forward                                  | GCG TCA TGG CTC AGC TAT TC        |
| <i>Arc</i> SARE reverse                                  | GCT TCC GGC ACC ATA AAA GG        |
| <i>Arc</i> TSS forward                                   | AGT GCT CTG GCG AGT AGT CC        |
| <i>Arc</i> TSS reverse                                   | TCG GGA CAG GCT AAG AAC TC        |

|                                                                |                                |
|----------------------------------------------------------------|--------------------------------|
| <i>Arc</i> (-441 bp) forward                                   | CAG GCA CTT CTG AGG TTG CA     |
| <i>Arc</i> (-441 bp) reverse                                   | GCT GAT GCG CCT ATC CTG A      |
| <i>Arc</i> (-2868 bp) forward                                  | GGG ACA CAC ACT GGT CTC AG     |
| <i>Arc</i> (-2868 bp) reverse                                  | TAC CCA AGG CTC TGG CCT AT     |
| <i>Ets1</i> forward                                            | AAC ACT GCG GTT CAG GTA GG     |
| <i>Ets1</i> reverse                                            | GAA CAA TGG CGT ATT GCG GG     |
| <i>Rnf167</i> forward                                          | ATG AGG CCT CTC GCG GTA AT     |
| <i>Rnf167</i> reverse                                          | GGT CCA AAA AGG CCG GTT GA     |
| <i>Ndfip1</i> forward                                          | CAC GTC TGA GGA TGG CAG TT     |
| <i>Ndfip1</i> reverse                                          | CAC TGA AGT CGT CTC CCT GC     |
| <i>Ytk6</i> forward                                            | TCG ACG TTC ATG TGT GTG GT     |
| <i>Ytk6</i> reverse                                            | CCA CAG TGC AAG GCA GTA GA     |
| <i>Yeats2</i> forward                                          | TCT CCG AAG CTT CCA TAC GAC    |
| <i>Yeats2</i> reverse                                          | CGC CTC GGC AAG TTT GGA TT     |
| <i>Parp9</i> forward                                           | GGG CTG GAA TTG CTA CTG TCT    |
| <i>Parp9</i> reverse                                           | GAC CTC GGT GGA CCG TTA TG     |
| <i>Pgr</i> forward                                             | AAG GTG AGG TAC AAA GTG GGT C  |
| <i>Pgr</i> reverse                                             | ACA GCA CTT TCT CAG ACG ACA T  |
| <i>Tenm4</i> forward                                           | AGT GCA GAC AGT TCT CCA GC     |
| <i>Tenm4</i> reverse                                           | TCT GTA GGT ACC CGG GAC TG     |
| <b>3C Primers</b>                                              |                                |
| Site 1                                                         | CCA GGC TCC TTG GCA AAA CAA A  |
| Site 2                                                         | CTT CCC TGG ACA ACA CCT CTG T  |
| Site 3                                                         | ACA CTG GGA AAG AGA AGC AGC A  |
| Site 4                                                         | CCT CTG CAG AGC CTT CTT CTC C  |
| SARE site                                                      | GGA CGT GGA CTA GCA CCA AGA T  |
| Anchor Fragment                                                | CTG GAG GTA GCA AGG GTG GAA A  |
| Internal <i>Hprt1</i>                                          | TCA GAG ACG CCA CGA ATC AG     |
| Internal <i>Hprt1</i>                                          | CCA GGC CCA ACT TGT CAG AA     |
| <b>Single guide (sg) RNAs sequence of <i>Arc</i> SARE site</b> |                                |
| <i>Arc</i> SARE sgRNA1                                         | GCG CGT AGA GCC TTC CTG CGT GG |
| <i>Arc</i> SARE sgRNA2                                         | CGC GTA GAG CCT TCC TGC GTG GG |
| <i>Arc</i> SARE sgRNA3                                         | AGC AAG GAG CTT CCC CAC GCA GG |
| <i>Arc</i> SARE sgRNA4                                         | CTT GCT TCC GGC ACC ATA AAA GG |

**Table S2: Antibody information**

| Antigen                                                | Isotype    | ChIP      | Confocal | Source and Catalog #               | RRID#      |
|--------------------------------------------------------|------------|-----------|----------|------------------------------------|------------|
| H3K27me3                                               | Rabbit IgG | 3 $\mu$ L | -        | Active Motif 39155                 | AB_2561020 |
| H3K27ac                                                | Rabbit IgG | 2 $\mu$ L | -        | Active Motif 39133                 | AB_2561016 |
| H3K9me3                                                | Rabbit IgG | 3 $\mu$ L | -        | Active Motif 39765                 | AB_2793334 |
| NELF-E                                                 | Mouse IgG  | 5 $\mu$ L | -        | Santa Cruz sc-377052               | AB_2847957 |
| Alexa Fluor® 488 Anti-CRISPR-Cas9 antibody [EPR18991]  | Rabbit IgG | -         | 1:200    | Abcam ab215239                     | AB_2892624 |
| Anti-NeuN Antibody, clone A60                          | Mouse IgG  | -         | 1:200    | Millipore Sigma MAB377             | AB_2298772 |
| Alexa Fluor® 647AffiniPure Donkey Anti-Mouse IgG (H+L) | Mouse IgG  | -         | 1:200    | Jackson ImmunoResearch 715-605-151 | AB_2340863 |

**Table S3:** Alcohol intake (g/kg) on each day by individual AIS and AIE adult rats infused with dCas9-P300 or dCas9-P300+ sgRNAs into CeA.

| Ethanol Drinking (g/kg)   |        |       |       |       |       |       |       |       |       |       |        |        |        |        |        |
|---------------------------|--------|-------|-------|-------|-------|-------|-------|-------|-------|-------|--------|--------|--------|--------|--------|
| Ethanol Concentration     |        | 3%    |       |       | 7%    |       |       | 9%    |       |       |        |        |        |        |        |
| Group                     | Animal | Day 1 | Day 2 | Day 3 | Day 4 | Day 5 | Day 6 | Day 7 | Day 8 | Day 9 | Day 10 | Day 11 | Day 12 | Day 13 | Day 14 |
| AIS + dCas9-P300          | 1      | 2.01  | 0.97  | 2.01  | 2.57  | 1.97  | 0.00  | 0.78  | 0.19  | 1.75  | 1.95   | 0.19   | 0.19   | 3.11   | 1.75   |
|                           | 2      | 1.68  | 1.36  | 0.84  | 0.60  | 1.06  | 4.37  | 1.16  | 0.58  | 1.16  | 0.78   | 0.78   | 2.13   | 3.30   | 1.94   |
|                           | 3      | 3.40  | 1.32  | 2.01  | 1.62  | 2.11  | 4.70  | 0.63  | 0.21  | 0.83  | 0.63   | 0.21   | 0.21   | 0.83   | 0.00   |
|                           | 4      | 3.01  | 1.62  | 2.16  | 2.16  | 2.34  | 3.60  | 0.00  | 0.46  | 0.69  | 0.69   | 0.69   | 0.23   | 1.39   | 0.46   |
|                           | 5      | 2.82  | 0.34  | 1.85  | 4.17  | 4.01  | 2.56  | 3.30  | 2.06  | 3.71  | 3.50   | 2.89   | 0.82   | 2.89   | 1.03   |
|                           | Mean   | 2.58  | 1.12  | 1.77  | 2.22  | 2.30  | 3.05  | 1.17  | 0.70  | 1.63  | 1.51   | 0.95   | 0.72   | 2.30   | 1.04   |
| SEM                       |        | 0.32  | 0.22  | 0.24  | 0.59  | 0.48  | 0.85  | 0.56  | 0.35  | 0.55  | 0.55   | 0.50   | 0.37   | 0.50   | 0.37   |
| AIS + dCas9-P300 + sgRNAs | 1      | 2.40  | 1.82  | 2.11  | 3.06  | 1.19  | 1.70  | 0.22  | 0.87  | 1.09  | 2.40   | 3.50   | 3.71   | 7.43   | 3.93   |
|                           | 2      | 2.86  | 1.00  | 2.00  | 4.84  | 0.17  | 0.33  | 1.50  | 4.50  | 5.36  | 2.14   | 3.00   | 0.64   | 3.22   | 2.57   |
|                           | 3      | 2.43  | 1.47  | 1.92  | 4.19  | 2.69  | 0.30  | 5.57  | 5.57  | 5.00  | 5.77   | 0.58   | 3.65   | 4.80   | 2.50   |
|                           | 4      | 1.06  | 1.06  | 2.05  | 1.39  | 3.86  | 1.24  | 3.18  | 2.38  | 5.56  | 4.17   | 1.99   | 2.18   | 3.97   | 2.18   |
|                           | 5      | 2.12  | 0.89  | 2.05  | 2.24  | 2.40  | 4.15  | 0.00  | 0.41  | 0.82  | 0.62   | 0.21   | 0.82   | 1.03   | 0.62   |
|                           | 6      | 2.67  | 1.80  | 1.86  | 2.61  | 1.89  | 3.92  | 0.56  | 0.37  | 1.49  | 1.12   | 0.19   | 1.49   | 0.75   | 0.19   |
| Mean                      | 2.26   | 1.34  | 2.00  | 3.06  | 2.03  | 1.94  | 1.84  | 2.35  | 3.22  | 2.70  | 1.58   | 2.08   | 3.53   | 2.00   |        |
| SEM                       | 0.26   | 0.17  | 0.04  | 0.52  | 0.52  | 0.70  | 0.88  | 0.91  | 0.94  | 0.79  | 0.60   | 0.55   | 1.02   | 0.56   |        |
| AIE + dCas9-P300          | 1      | 3.29  | 2.45  | 2.80  | 6.53  | 6.37  | 8.00  | 9.66  | 7.56  | 7.98  | 8.61   | 6.30   | 6.09   | 7.98   | 8.40   |
|                           | 2      | 3.36  | 2.13  | 2.88  | 5.60  | 5.28  | 3.84  | 9.47  | 8.64  | 9.05  | 8.23   | 7.41   | 8.03   | 8.85   | 8.85   |
|                           | 3      | 1.89  | 1.89  | 2.39  | 5.57  | 5.87  | 5.87  | 5.09  | 4.53  | 6.22  | 7.92   | 5.09   | 5.28   | 7.92   | 5.28   |
|                           | 4      | 2.23  | 2.08  | 2.73  | 5.53  | 6.54  | 8.21  | 6.68  | 7.76  | 8.19  | 8.19   | 6.46   | 7.11   | 7.33   | 7.33   |
|                           | 5      | 2.52  | 1.70  | 2.66  | 7.08  | 6.74  | 8.46  | 6.00  | 6.22  | 6.66  | 7.11   | 6.22   | 6.88   | 7.11   | 6.66   |
|                           | 6      | 1.71  | 0.27  | 3.08  | 5.43  | 5.27  | 7.82  | 5.33  | 5.13  | 6.98  | 5.74   | 5.54   | 5.95   | 5.74   | 6.36   |
| Mean                      | 2.50   | 1.75  | 2.76  | 5.96  | 6.01  | 7.03  | 7.04  | 6.64  | 7.51  | 7.63  | 6.17   | 6.56   | 7.49   | 7.15   |        |
| SEM                       | 0.28   | 0.31  | 0.09  | 0.28  | 0.26  | 0.74  | 0.83  | 0.66  | 0.44  | 0.43  | 0.33   | 0.40   | 0.43   | 0.54   |        |
| AIE + dCas9-P300 + sgRNAs | 1      | 1.30  | 0.80  | 1.81  | 3.88  | 0.17  | 1.52  | 0.43  | 1.74  | 3.04  | 1.95   | 1.95   | 2.39   | 3.47   | 3.69   |
|                           | 2      | 2.49  | 1.38  | 1.44  | 4.13  | 0.15  | 5.20  | 0.20  | 0.59  | 0.79  | 0.20   | 0.00   | 2.95   | 0.59   | 1.18   |
|                           | 3      | 2.55  | 2.43  | 2.12  | 3.63  | 3.05  | 3.49  | 2.24  | 3.36  | 0.75  | 2.06   | 1.68   | 2.06   | 2.62   | 1.49   |
|                           | 4      | 2.75  | 0.85  | 1.91  | 3.29  | 0.00  | 3.95  | 0.21  | 0.42  | 0.42  | 0.21   | 0.21   | 1.06   | 0.42   | 0.64   |
|                           | 5      | 2.84  | 0.82  | 1.95  | 1.75  | 1.57  | 2.79  | 0.00  | 0.67  | 1.57  | 1.35   | 0.45   | 1.12   | 2.47   | 0.90   |
|                           | 6      | 1.81  | 0.08  | 1.73  | 2.99  | 2.64  | 0.00  | 0.23  | 0.90  | 0.23  | 1.58   | 0.90   | 2.71   | 1.13   | 0.23   |
| Mean                      | 2.29   | 1.06  | 1.83  | 3.28  | 1.26  | 2.83  | 0.55  | 1.28  | 1.13  | 1.23  | 0.87   | 2.05   | 1.78   | 1.36   |        |
| SEM                       | 0.25   | 0.32  | 0.09  | 0.35  | 0.55  | 0.75  | 0.34  | 0.46  | 0.42  | 0.34  | 0.33   | 0.33   | 0.51   | 0.50   |        |

**Table S4:** Sucrose intake (g/kg) on each day by individual AIS and AIE adult rats infused with dCas9-P300 or dCas9-P300+ sgRNAs into CeA.

| Sucrose Drinking (g/kg)   |        |       |       |       |       |       |       |       |       |
|---------------------------|--------|-------|-------|-------|-------|-------|-------|-------|-------|
| Sucrose Concentration     |        | 2%    |       |       | 4%    |       |       |       |       |
| Group                     | Animal | Day 1 | Day 2 | Day 3 | Day 4 | Day 5 | Day 6 | Day 7 | Day 8 |
| AIS + dCas9-P300          | 1      | 2.64  | 1.34  | 1.26  | 3.15  | 3.39  | 3.94  | 6.54  | 2.94  |
|                           | 2      | 3.05  | 2.89  | 1.74  | 5.79  | 5.23  | 5.39  | 9.20  | 5.51  |
|                           | 3      | 4.17  | 3.31  | 2.67  | 0.00  | 9.89  | 9.63  | 10.24 | 10.83 |
|                           | 4      | 2.70  | 1.62  | 2.56  | 4.23  | 5.90  | 5.01  | 6.78  | 4.01  |
|                           | 5      | 4.20  | 0.04  | 4.02  | 8.57  | 8.92  | 9.44  | 9.62  | 10.26 |
|                           | Mean   | 3.35  | 1.84  | 2.45  | 4.35  | 6.67  | 6.68  | 8.48  | 6.71  |
|                           | SEM    | 0.35  | 0.58  | 0.47  | 1.42  | 1.20  | 1.19  | 0.76  | 1.62  |
| AIS + dCas9-P300 + sgRNAs | 1      | 2.96  | 2.00  | 2.14  | 3.64  | 8.02  | 7.56  | 9.02  | 10.58 |
|                           | 2      | 3.35  | 1.79  | 0.00  | 8.75  | 9.02  | 6.88  | 10.09 | 10.01 |
|                           | 3      | 2.17  | 2.09  | 2.40  | 7.59  | 8.75  | 8.60  | 8.83  | 1.28  |
|                           | 4      | 3.24  | 2.15  | 2.19  | 8.24  | 9.51  | 9.76  | 10.01 | 9.71  |
|                           | 5      | 2.95  | 2.16  | 1.85  | 5.10  | 4.75  | 5.10  | 1.58  | 5.84  |
|                           | 6      | 3.76  | 3.52  | 2.63  | 7.59  | 8.75  | 6.20  | 8.36  | 7.96  |
|                           | Mean   | 3.07  | 2.29  | 1.87  | 6.82  | 8.13  | 7.35  | 7.98  | 7.56  |
| SEM                       | 0.22   | 0.25  | 0.39  | 0.82  | 0.70  | 0.68  | 1.31  | 1.44  |       |
| AIE + dCas9-P300          | 1      | 4.16  | 3.00  | 2.19  | 8.41  | 9.70  | 10.21 | 10.13 | 0.65  |
|                           | 2      | 4.05  | 3.25  | 3.59  | 8.18  | 9.68  | 9.26  | 9.01  | 9.88  |
|                           | 3      | 2.14  | 1.80  | 3.71  | 2.83  | 6.95  | 5.50  | 8.56  | 4.36  |
|                           | 4      | 4.29  | 2.56  | 2.17  | 8.66  | 9.55  | 9.19  | 10.34 | 8.43  |
|                           | 5      | 2.69  | 1.81  | 1.95  | 4.64  | 4.64  | 5.10  | 10.12 | 6.61  |
|                           | 6      | 2.77  | 2.30  | 1.75  | 8.36  | 7.59  | 9.30  | 9.98  | 8.12  |
|                           | Mean   | 3.35  | 2.45  | 2.56  | 6.85  | 8.02  | 8.09  | 9.69  | 6.34  |
| SEM                       | 0.38   | 0.25  | 0.35  | 1.01  | 0.83  | 0.90  | 0.30  | 1.37  |       |
| AIE + dCas9-P300 + sgRNAs | 1      | 2.97  | 3.56  | 2.28  | 8.04  | 0.00  | 9.86  | 9.86  | 11.00 |
|                           | 2      | 3.54  | 0.04  | 4.04  | 8.16  | 11.07 | 10.49 | 9.82  | 9.96  |
|                           | 3      | 2.22  | 1.53  | 1.68  | 3.29  | 5.43  | 4.81  | 8.48  | 0.33  |
|                           | 4      | 4.10  | 2.75  | 3.36  | 8.56  | 9.87  | 0.44  | 9.52  | 0.09  |
|                           | 5      | 2.88  | 2.08  | 2.12  | 6.89  | 8.68  | 7.45  | 10.75 | 10.87 |
|                           | 6      | 4.64  | 4.35  | 3.92  | 8.03  | 10.80 | 10.51 | 11.85 | 11.35 |
|                           | Mean   | 3.39  | 2.39  | 2.90  | 7.16  | 7.64  | 7.26  | 10.05 | 7.27  |
| SEM                       | 0.36   | 0.62  | 0.41  | 0.81  | 1.74  | 1.64  | 0.47  | 2.24  |       |

**Table S5:** Alcohol intake (g/kg) on each day by individual alcohol naïve control adult rats infused with dCas9-KRAB or dCas9-KRAB+ sgRNAs into CeA.

| Ethanol Drinking (g/kg) |        |       |       |       |       |       |       |       |       |       |        |        |        |        |        |
|-------------------------|--------|-------|-------|-------|-------|-------|-------|-------|-------|-------|--------|--------|--------|--------|--------|
| Ethanol Concentration   |        | 3%    |       |       | 7%    |       |       | 9%    |       |       |        |        |        |        |        |
| Group                   | Animal | Day 1 | Day 2 | Day 3 | Day 4 | Day 5 | Day 6 | Day 7 | Day 8 | Day 9 | Day 10 | Day 11 | Day 12 | Day 13 | Day 14 |
| dCas9-KRAB              | 1      | 1.91  | 1.11  | 1.03  | 0.74  | 3.90  | 1.30  | 2.86  | 1.19  | 2.15  | 0.95   | 1.19   | 1.19   | 3.10   | 0.72   |
|                         | 2      | 1.73  | 1.67  | 2.20  | 1.40  | 3.73  | 2.64  | 0.80  | 1.20  | 0.40  | 0.40   | 0.20   | 1.20   | 0.60   | 0.80   |
|                         | 3      | 2.13  | 2.05  | 2.99  | 2.19  | 4.78  | 0.60  | 0.51  | 5.37  | 4.61  | 3.07   | 4.09   | 1.79   | 1.02   | 3.07   |
|                         | 4      | 2.85  | 2.35  | 2.01  | 1.37  | 2.74  | 0.20  | 1.01  | 1.01  | 2.01  | 0.75   | 1.51   | 0.75   | 1.51   | 1.01   |
|                         | 5      | 2.16  | 1.64  | 3.29  | 1.01  | 0.00  | 0.20  | 0.00  | 1.30  | 0.26  | 1.30   | 0.52   | 0.26   | 0.78   | 0.78   |
|                         | 6      | 2.01  | 1.93  | 2.09  | 0.94  | 3.56  | 1.31  | 0.96  | 1.93  | 2.41  | 1.69   | 1.69   | 1.20   | 0.48   | 1.45   |
|                         | Mean   |       | 2.13  | 1.79  | 2.27  | 1.28  | 3.12  | 1.04  | 1.02  | 2.00  | 1.97   | 1.36   | 1.53   | 1.07   | 1.25   |
| SEM                     |        | 0.16  | 0.17  | 0.33  | 0.21  | 0.68  | 0.38  | 0.40  | 0.69  | 0.65  | 0.39   | 0.56   | 0.21   | 0.40   | 0.37   |
| dCas9-KRAB + sgRNAs     | 1      | 1.61  | 1.70  | 2.04  | 4.36  | 3.97  | 3.37  | 5.86  | 3.82  | 5.61  | 3.31   | 4.08   | 6.12   | 4.84   | 2.29   |
|                         | 2      | 1.81  | 1.72  | 2.32  | 2.81  | 5.62  | 4.81  | 7.48  | 6.45  | 5.93  | 6.19   | 4.90   | 0.52   | 5.93   | 3.35   |
|                         | 3      | 1.78  | 2.04  | 1.95  | 4.56  | 4.16  | 4.76  | 6.37  | 6.88  | 5.86  | 6.37   | 6.12   | 6.12   | 5.86   | 5.35   |
|                         | 4      | 2.12  | 1.27  | 2.46  | 2.18  | 5.15  | 3.17  | 6.62  | 6.11  | 6.11  | 6.62   | 8.14   | 6.87   | 7.38   | 7.38   |
|                         | 5      | 1.59  | 1.91  | 1.67  | 1.30  | 3.71  | 1.86  | 2.63  | 4.30  | 3.10  | 3.10   | 2.15   | 3.82   | 2.15   | 0.24   |
|                         | 6      | 1.46  | 1.29  | 2.02  | 1.32  | 3.78  | 0.76  | 0.24  | 1.21  | 0.73  | 0.73   | 0.24   | 5.83   | 1.94   | 2.91   |
|                         | 7      | 1.52  | 1.90  | 1.83  | 4.26  | 4.62  | 3.02  | 6.62  | 3.43  | 6.40  | 5.48   | 6.17   | 5.25   | 6.62   | 5.71   |
|                         | 8      | 3.04  | 1.74  | 2.87  | 2.03  | 6.09  | 4.06  | 5.74  | 2.87  | 7.57  | 5.22   | 8.87   | 3.13   | 6.26   | 8.61   |
|                         | Mean   |       | 1.87  | 1.70  | 2.15  | 2.85  | 4.64  | 3.23  | 5.20  | 4.38  | 5.16   | 4.63   | 5.08   | 4.71   | 5.12   |
| SEM                     |        | 0.18  | 0.10  | 0.14  | 0.48  | 0.32  | 0.49  | 0.87  | 0.70  | 0.77  | 0.73   | 1.03   | 0.74   | 0.72   | 0.98   |

**Table S6:** Sucrose intake (g/kg) on each day by individual alcohol naïve control adult rats infused with dCas9-KRAB or dCas9-KRAB+ sgRNAs into CeA.

| Sucrose Drinking (g/kg) |        |       |       |       |       |       |       |       |      |
|-------------------------|--------|-------|-------|-------|-------|-------|-------|-------|------|
| Sucrose Concentration   |        | 2%    |       |       | 4%    |       |       |       |      |
| Group                   | Animal | Day 1 | Day 2 | Day 3 | Day 4 | Day 5 | Day 6 | Day 7 |      |
| dCas9-KRAB              | 1      | 4.70  | 2.23  | 3.34  | 6.20  | 10.46 | 5.52  | 7.46  |      |
|                         | 2      | 3.14  | 2.32  | 1.49  | 4.84  | 5.35  | 4.02  | 4.02  |      |
|                         | 3      | 3.71  | 1.63  | 2.38  | 5.15  | 8.02  | 4.26  | 5.94  |      |
|                         | 4      | 5.78  | 5.61  | 5.45  | 0.11  | 12.96 | 2.05  | 10.58 |      |
|                         | 5      | 4.41  | 2.50  | 3.20  | 11.31 | 11.01 | 10.41 | 10.11 |      |
|                         | Mean   |       | 4.35  | 2.86  | 3.17  | 5.52  | 9.56  | 5.25  | 7.62 |
|                         | SEM    |       | 0.45  | 0.70  | 0.66  | 1.79  | 1.31  | 1.40  | 1.24 |
| dCas9-KRAB + sgRNAs     | 1      | 3.70  | 2.76  | 4.07  | 3.23  | 10.64 | 5.63  | 11.16 |      |
|                         | 2      | 4.76  | 2.62  | 2.15  | 12.15 | 10.99 | 11.62 | 11.10 |      |
|                         | 3      | 2.57  | 1.85  | 2.05  | 1.03  | 6.37  | 6.98  | 6.78  |      |
|                         | 4      | 5.57  | 2.20  | 4.34  | 11.44 | 11.85 | 6.64  | 11.65 |      |
|                         | 5      | 2.92  | 1.56  | 2.83  | 8.09  | 8.09  | 4.48  | 9.26  |      |
|                         | 6      | 2.18  | 1.55  | 1.68  | 3.18  | 4.00  | 4.73  | 3.91  |      |
|                         | 7      | 6.01  | 3.72  | 5.43  | 11.81 | 0.00  | 10.96 | 10.96 |      |
|                         | Mean   |       | 3.96  | 2.32  | 3.22  | 7.28  | 7.42  | 7.29  | 9.26 |
| SEM                     |        | 0.57  | 0.29  | 0.53  | 1.79  | 1.63  | 1.09  | 1.10  |      |
